# Supplementary material for: Predicting Progression of Kidney Injury Based on Elastography Ultrasound and Radiomics Signatures
Source: MDPI journal article supplement (doi:10.3390/diagnostics12112678), 2022-11-03
Supplement: s1 [file s1]

## Supplementary Materials

### Supplementary Figure S1. The flowchart of the study cohort

SWE, shear wave elastography ultrasound.

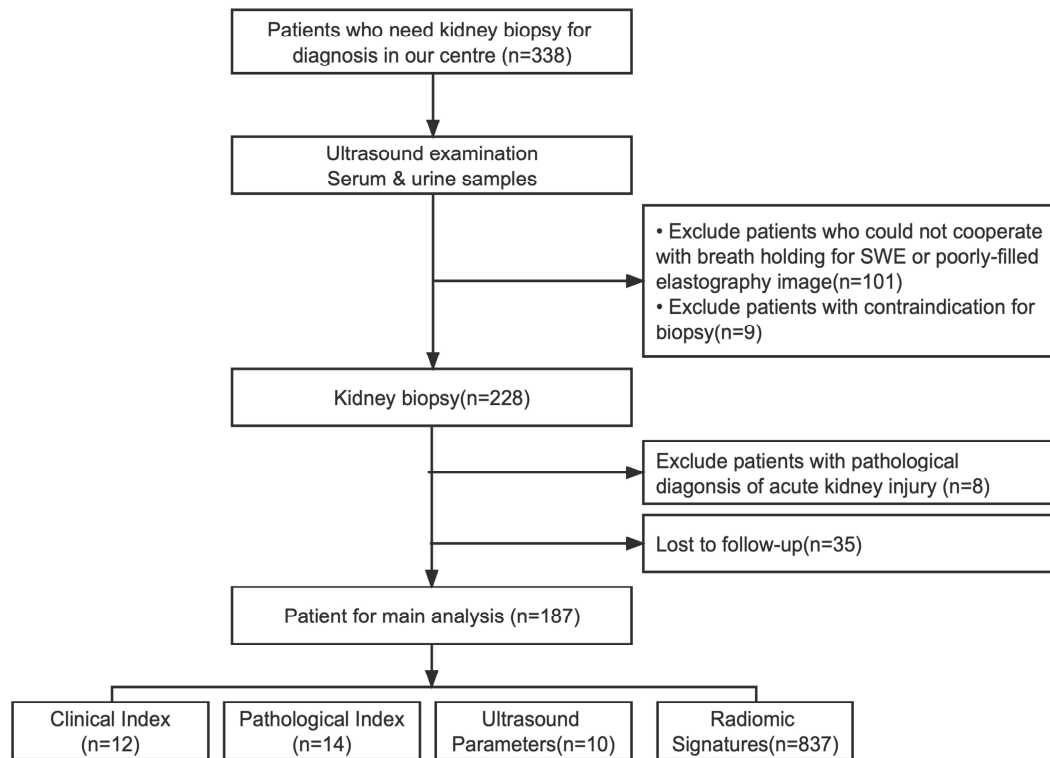

## Supplementary Figure S2. Value of shear wave elastography ultrasound in the left kidney cortex, sinus, medulla grouped by BMI.

BMI, body mass index; BMI < 20 kg/m<sup>2</sup> is defined as Below, 20-30 kg/m<sup>2</sup> Normal, > 30 kg/m<sup>2</sup> Over; L\_C\_mean, mean SWE value of left renal cortex; L\_C\_median, median SWE value of left renal cortex; L\_M\_mean, mean SWE value of left renal medulla; L\_M\_median, median SWE value of left renal medulla; L\_S\_mean, mean SWE value of left renal sinus; L\_S\_median, median SWE value of left renal sinus. Kruskal-Wallis test was applied in with-group difference. A p < 0.05 was considered significant.

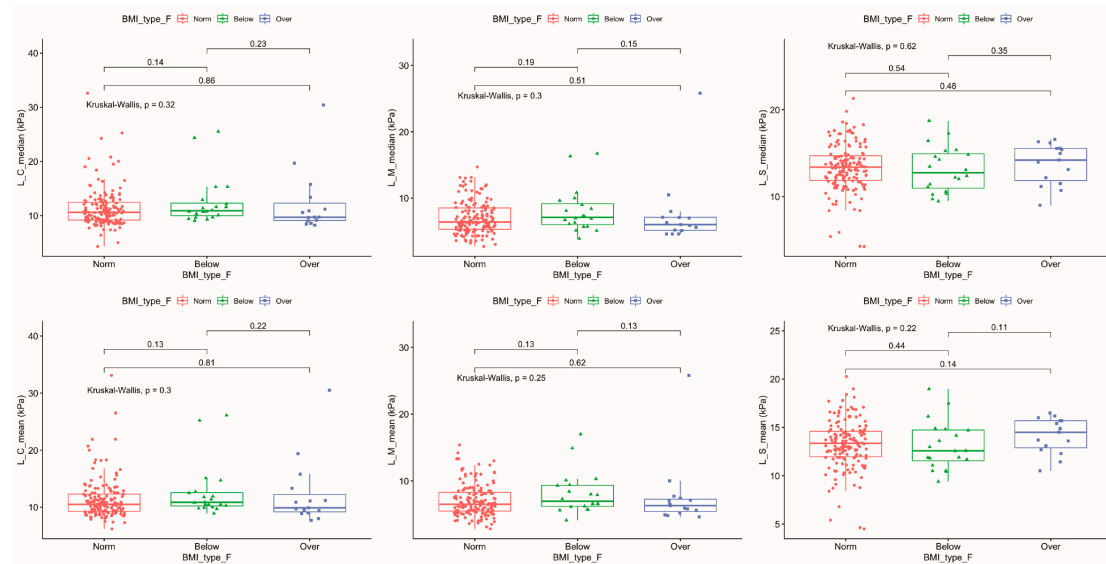

**Supplementary Figure S3. Patients' serum creatinine and eGFR at baseline and last follow-up.**

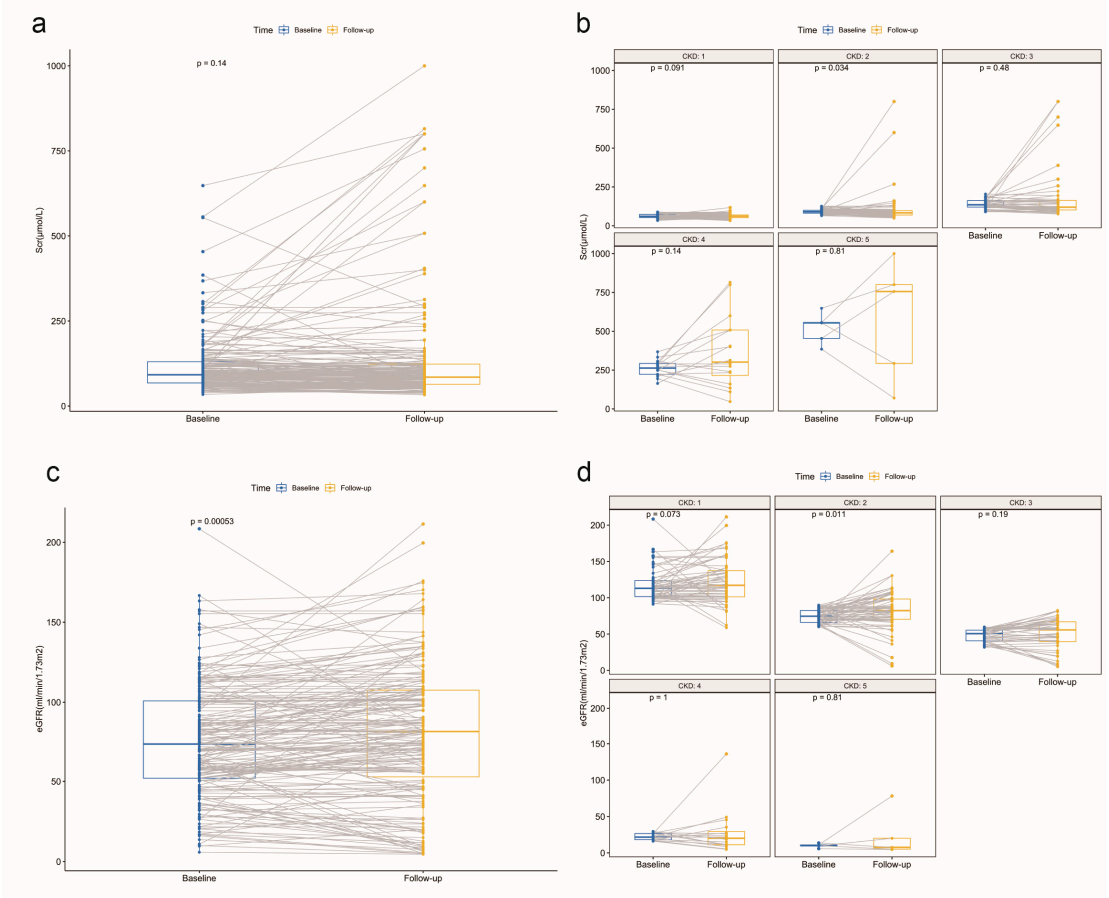

## Supplementary Figure S4. Cutoff value based on Kaplan-Meier method

eGFR, eGFR at baseline; Scr, serum creatinine at baseline; ACR, urinary albumin to creatinine ratio at baseline; L\_C\_median, median SWE value of left renal cortex; L\_S\_mean, mean SWE value of left renal sinus; Length, length of left kidney.

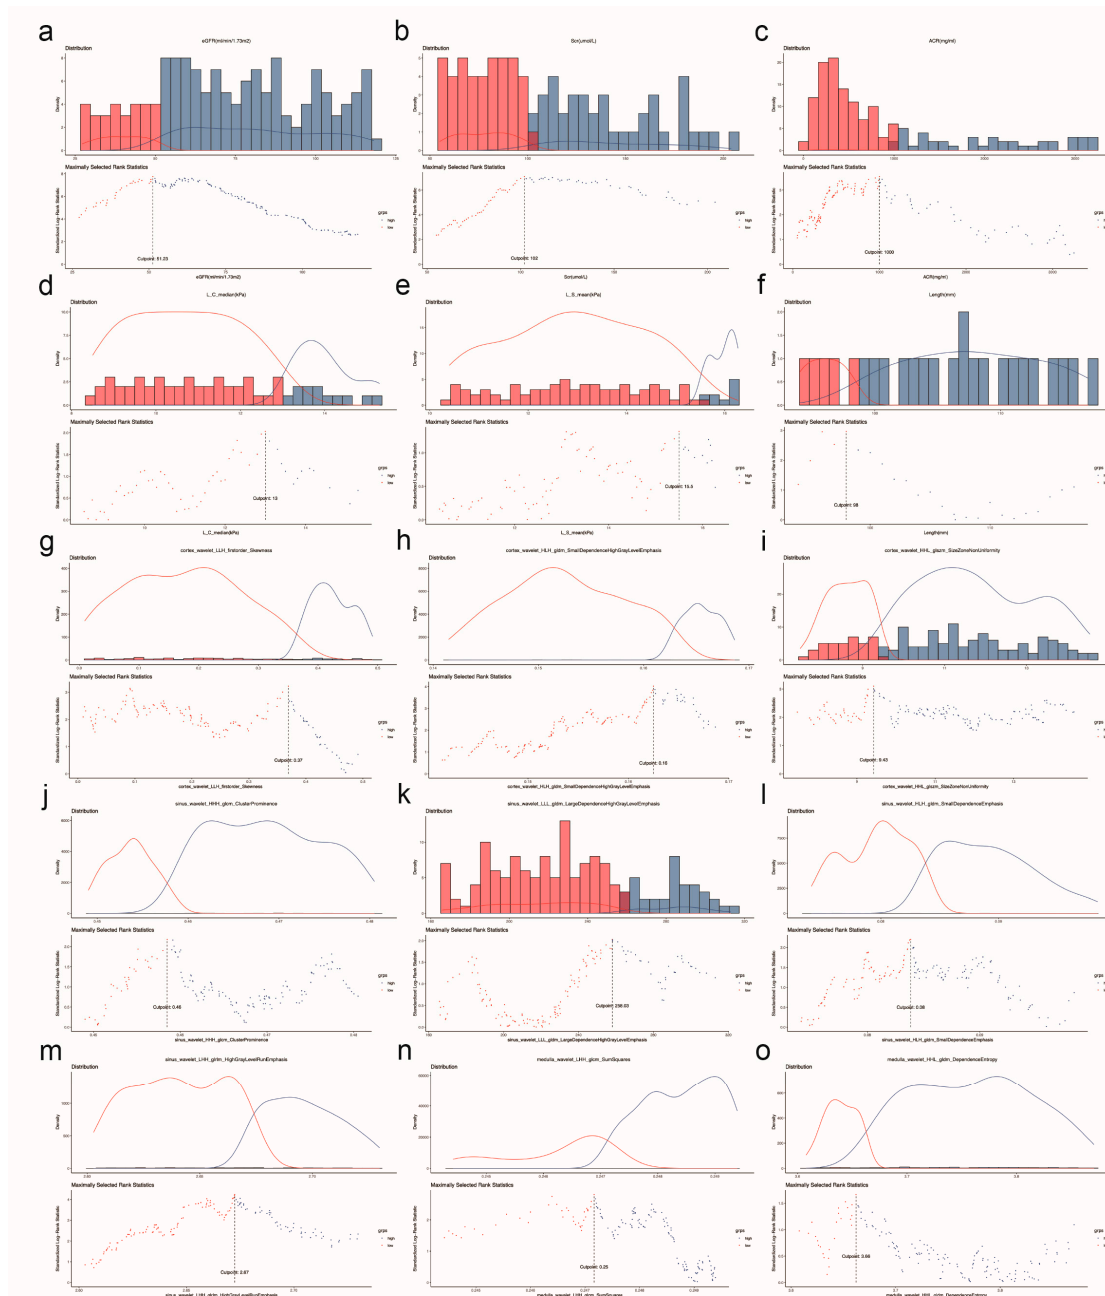

**Supplementary Table S1. Test of proportional hazards assumption for the multivariate Cox regression model.**

|                                                              | Chi-square | Pvalue |
|--------------------------------------------------------------|------------|--------|
| eGFR(ml/min/1.73m <sup>2</sup> )                             | 1.680      | 0.195  |
| Scr(μmol/L)                                                  | 0.749      | 0.387  |
| ACR(mg/g)                                                    | 0.171      | 0.680  |
| TA                                                           | 4.190      | 0.242  |
| A_C                                                          | 5.410      | 0.144  |
| L_C_median(kPa)                                              | 0.976      | 0.323  |
| L_S_mean(kPa)                                                | 1.190      | 0.276  |
| Length_mm(kPa)                                               | 0.956      | 0.328  |
| cortex_wavelet_LLH_firstorder_Skewness                       | 5.940      | 0.015  |
| cortex_wavelet_HLH_gldm_SmallDependenceHighGrayLevelEmphasis | 2.040      | 0.154  |
| cortex_wavelet_HHL_glszm_SizeZoneNonUniformity               | 0.716      | 0.397  |
| sinus_wavelet_LHH_glrlm_HighGrayLevelRunEmphasis             | 0.008      | 0.929  |
| sinus_wavelet_HLH_gldm_SmallDependenceEmphasis               | 1.560      | 0.211  |
| sinus_wavelet_HHH_glcmm_ClusterProminence                    | 0.022      | 0.881  |
| sinus_wavelet_LLL_gldm_LargeDependenceHighGrayLevelEmphasis  | 0.000      | 0.998  |
| medulla_wavelet_LHH_glcmm_SumSquares                         | 0.000      | 0.985  |
| medulla_wavelet_HHL_gldm_DependenceEntropy                   | 1.040      | 0.308  |
| GLOBAL                                                       | 28.900     | 0.117  |

eGFR, eGFR at baseline; Scr, serum creatinine at baseline; ACR, urinary albumin to creatinine ratio at baseline; TA, tubular atrophy; A\_C, artery/arteriole hyalinosis. L\_C\_mean, mean SWE value of left renal cortex; L\_C\_median, median SWE value of left renal cortex; L\_M\_mean, mean SWE value of left renal medulla; L\_M\_median, median SWE value of left renal medulla; L\_S\_mean, mean SWE value of left renal sinus; L\_S\_median, median SWE value of left renal sinus; Length, length of left kidney.

Supplementary Table S2. The multicollinearity diagnosis for the multivariate Cox regression.

| Parameters in multivariate regression                | Tolerance | Variance inflation factor |
|------------------------------------------------------|-----------|---------------------------|
| eGFR(ml/min/1.73m <sup>2</sup> )                     | 0.331     | 3.025                     |
| Scr(μmol/L)                                          | 0.375     | 2.666                     |
| ACR(mg/g)                                            | 0.949     | 1.053                     |
| TA                                                   | 0.484     | 2.066                     |
| A_C                                                  | 0.715     | 1.399                     |
| L_C_median(kPa)                                      | 0.943     | 1.060                     |
| Length(mm)                                           | 0.778     | 1.285                     |
| cortex_wavelet_LLH_firstorder_Skewness               | 0.822     | 1.216                     |
| cortex_wavelet_HLH_gldm_SmallDependenceHighGrayLevel |           |                           |
| Emphasis                                             | 0.924     | 1.082                     |
| cortex_wavelet_HHL_glszm_SizeZoneNonUniformity       | 0.843     | 1.186                     |
| sinus_wavelet_LHH_glrhm_HighGrayLevelRunEmphasis     | 0.856     | 1.169                     |
| sinus_wavelet_HLH_gldm_SmallDependenceEmphasis       | 0.789     | 1.268                     |
| sinus_wavelet_HHH_gldm_ClusterProminence             | 0.783     | 1.277                     |
| sinus_wavelet_LLL_gldm_LargeDependenceHighGrayLevelE |           |                           |
| mphasis                                              | 0.854     | 1.171                     |
| medulla_wavelet_LHH_gldm_SumSquares                  | 0.912     | 1.096                     |
| medulla_wavelet_HHL_gldm_DependenceEntropy           | 0.870     | 1.149                     |

eGFR, eGFR at baseline; Scr, serum creatinine at baseline; ACR, urinary albumin to creatinine ratio at baseline; TA, tubular atrophy; A\_C, artery/arteriole hyalinosis. L\_C\_mean, mean SWE value of left renal cortex; L\_C\_median, median SWE value of left renal cortex; L\_M\_mean, mean SWE value of left renal medulla; L\_M\_median, median SWE value of left renal medulla; L\_S\_mean, mean SWE value of left renal sinus; L\_S\_median, median SWE value of left renal sinus; Length, length of left kidney.

**Supplementary Table S3. C-index of Cox regression models.**

| Cox Regression Model     | C-index(95%CI)         |
|--------------------------|------------------------|
| Model-All                | 0.9051(0.8460–0.9196)  |
| Model-Clin+Patho         | 0.8540(0.7984–0.8920)  |
| Model-Clin+SWE           | 0.8341(0.7727–0.8771)  |
| Model-Clin+SWE+Radiomics | 0.8724 (0.8105–0.8908) |

Clin, clinical features of eGFR at baseline, Scr at baseline, ACR at baseline; Patho, pathological features of tubular atrophy, artery/arteriole hyalinosis; SWE, elastography parameters of median SWE value of left renal cortex, mean SWE value of left renal sinus; Radiomics, Radiomics signatures of cortex wavelet LLH firstorder Skewness, cortex wavelet HLH glcm SmallDependenceHighGrayLevelEmphasis, cortex wavelet HHL glszm SizeZoneNonUniformity, sinus wavelet LHH glrlm HighGrayLevelRunEmphasis, sinus wavelet HLH glcm SmallDependenceEmphasis, sinus wavelet HHH glcm ClusterProminence, sinus wavelet LLL glcm LargeDependenceHighGrayLevelEmphasis, medulla wavelet LHH glcm SumSquares, medulla wavelet HHL glcm DependenceEntropy; Model1-All, Cox regression model of all features; Model2-Clin+Patho, Cox regression model of clinical and pathological features and length of left kidney; Model3-Clin+SWE, Cox regression model of clinical features, length of left kidney, elastography parameters; Model4-Clin+SWE+Radiomics, Cox regression model of clinical features, length of left kidney, elastography parameters, and radiomics signatures.

**Supplementary Table S4. Comparison of time—dependent ROCs of Cox regression models**

| Cox Regression Model                         | t=12   | t=24   | t=30   |
|----------------------------------------------|--------|--------|--------|
| Model-Clin+Patho vs Model-Clin+SWE           | 0.9045 | 0.1084 | 0.8531 |
| Model-Clin+Patho vs Model-Clin+SWE+Radiomics | 0.4927 | 0.6925 | 0.0099 |
| Model-Clin+Patho vs Model-All                | 0.9997 | 0.9547 | 0.0024 |
| Model-Clin+SWE+Radiomics vs Model-All        | 0.4927 | 0.6925 | 0.0099 |

The areas under curves (AUCs) at 12, 24, 30 months of time-dependent ROCs were calculated and compared using the method of Hanley and McNeil for a single time point; Data in the sheet are adjusted p value; t, time; Clin, clinical features of eGFR at baseline, Scr at baseline, ACR at baseline; Patho, pathological features of tubular atrophy, artery/arteriole hyalinosis; SWE, elastography parameters of median SWE value of left renal cortex, mean SWE value of left renal sinus; Radiomics, Radiomics signatures of cortex wavelet LLH firstorder Skewness, cortex wavelet HLH glgm SmallDependenceHighGrayLevelEmphasis, cortex wavelet HHL glszm SizeZoneNonUniformity, sinus wavelet LHH glrlm HighGrayLevelRunEmphasis, sinus wavelet HLH glgm SmallDependenceEmphasis, sinus wavelet HHH glcm ClusterProminence, sinus wavelet LLL glgm LargeDependenceHighGrayLevelEmphasis, medulla wavelet LHH glcm SumSquares, medulla wavelet HHL glgm DependenceEntropy; Model1—All, Cox regression model of all features; Model2—Clin+Patho, Cox regression model of clinical and pathological features and length of left kidney; Model3—Clin+SWE, Cox regression model of clinical features, length of left kidney, elastography parameters; Model4—Clin+SWE+Radiomics, Cox regression model of clinical features, length of left kidney, elastography parameters, and radiomics signatures.



**Supplementary Table S5. Baseline characters of the train and test cohort**

|                                        | Total (n=187)           | Train(n=149)            | Test(n=38)              | P-value |
|----------------------------------------|-------------------------|-------------------------|-------------------------|---------|
| Age(year)                              | 45.00(32.00–59.00)      | 46.00(32.00–59.00)      | 44.00(35.00–54.00)      | 0.846   |
| Sex(male%)                             | 105(56.1%)              | 88(83.80%)              | 17(16.20%)              | 0.112   |
| BMI(kg/m <sup>2</sup> )                | 24.30(21.96–27.16)      | 24.57(22.05–27.39)      | 23.14(21.06–25.66)      | 0.111   |
| SBP(mmHg)                              | 141.00(121.00–165.00)   | 146.00(120.50–166.00)   | 141.00(123.75–163.75)   | 0.732   |
| DBP(mmHg)                              | 77.50(70.00–85.75)      | 78.00(69.00–85.00)      | 76.50(69.25–88.75)      | 0.797   |
| eGFR(MDRD)(ml.min/1.73m <sup>2</sup> ) | 73.35(51.96–101.88)     | 75.07(52.84–101.63)     | 61.82(42.71–100.59)     | 0.197   |
| Scr(μmol/L)                            | 92.00(68.00–131.00)     | 89.00(68.00–128.00)     | 96.50(64.75–165.50)     | 0.419   |
| BUN(mmol/L)                            | 5.50(4.23–7.38)         | 5.50(4.30–7.25)         | 5.35(4.10–7.65)         | 0.838   |
| UA(μmol/L)                             | 363.50(299.50–412.50)   | 363.00(300.00–402.50)   | 402.00(302.75–440.25)   | 0.161   |
| Alb(g/L)                               | 35.60(29.95–41.05)      | 35.40(29.35–40.65)      | 36.90(29.51–41.30)      | 0.577   |
| 24hUpro(mg)                            | 1454.40(624.60–3397.15) | 1524.60(646.50–3544.50) | 1304.85(551.40–2466.75) | 0.249   |
| ACR(mg/g)                              | 565.95(253.03–1788.85)  | 568.50(264.65–1751.20)  | 543.70(241.85–1084.50)  | 0.501   |
| Pathological Changes                   | Total (n=187)           | Train(n=149)            | Test(n=38)              | P-value |
| Glomerular_Global Sclerosis            | 20.00%(5.88%–43.75%)    | 20.00%(5.38%–42.26%)    | 20.00%(4.55%–50.00%)    | 0.656   |
| Glomerular_Focal Segmental Sclerosis   | 0.00%(0.00%–7.69%)      | 0.00%(0.00%–7.55%)      | 0.00%(0.00%–8.46%)      | 0.871   |
| Glomerular_Crescents                   | 0.00%(0.00%–3.33%)      | 0.00%(0.00%–0.00%)      | 0.00%(0.00%–5.05%)      | 0.386   |
| Glomerular_Fibrinoid necrosis          | 0.00%(0.00%–0.00%)      | 0.00%(0.00%–0.00%)      | 0.00%(0.00%–0.00%)      | 0.403   |
| Mesengial Matrix hyperplasia           |                         |                         |                         | 0.790   |
| 0                                      | 17(9.10%)               | 13(76.50%)              | 4(23.50%)               |         |
| 1                                      | 140(74.90%)             | 112(80.00%)             | 28(20.00%)              |         |
| 2                                      | 20(10.70%)              | 17(85.00%)              | 3(15.00%)               |         |
| 3                                      | 10(5.30%)               | 7(70.00%)               | 3(30.00%)               |         |
| Mesangial hypercellularity             |                         |                         |                         | 0.254   |
| 0                                      | 30(16.00%)              | 24(80.00%)              | 6(20.00%)               |         |

|                               |             |             |            |       |
|-------------------------------|-------------|-------------|------------|-------|
| 1                             | 134(71.70%) | 108(80.60%) | 26(19.40%) | 0.748 |
| 2                             | 22(11.80%)  | 17(77.30%)  | 5(22.70%)  |       |
| 3                             | 1(0.50%)    | 0(0.00%)    | 1(100.00%) |       |
| Intra-capillary proliferation |             |             |            |       |
| 0                             | 144(77.00%) | 115(79.90%) | 29(20.10%) | 0.094 |
| 1                             | 2(1.10%)    | 2(100.00%)  | 0(0.00%)   |       |
| 2                             | 41(21.90%)  | 32(78.00%)  | 9(22.00%)  |       |
| 3                             | 0(0.00%)    | 0(0.00%)    | 0(0.00%)   |       |
| Capillary wall hyalinosis     |             |             |            | 0.526 |
| 0                             | 114(61.00%) | 85(74.60%)  | 29(25.40%) |       |
| 1                             | 49(26.20%)  | 42(85.70%)  | 7(14.30%)  |       |
| 2                             | 21(11.20%)  | 20(95.20%)  | 1(4.80%)   |       |
| 3                             | 3(1.60%)    | 2(66.70%)   | 1(33.30%)  |       |
| Tubular atrophy               |             |             |            | 0.536 |
| 0                             | 14(7.50%)   | 12(85.70%)  | 2(14.30%)  |       |
| 1                             | 88(47.10%)  | 71(80.70%)  | 17(19.30%) |       |
| 2                             | 63(33.70%)  | 51(81.00%)  | 12(19.00%) |       |
| 3                             | 22(11.80%)  | 15(68.20%)  | 7(31.80%)  |       |
| Interstitial inflammation     |             |             |            | 0.480 |
| 0                             | 14(7.50%)   | 13(92.90%)  | 1(7.10%)   |       |
| 1                             | 91(48.70%)  | 72(79.10%)  | 19(20.90%) |       |
| 2                             | 60(32.10%)  | 48(80.00%)  | 12(20.00%) |       |
| 3                             | 22(11.80%)  | 16(72.70%)  | 6(27.30%)  |       |
| Interstitial fibrosis         |             |             |            | 0.480 |
| 0                             | 13(7.00%)   | 12(92.30%)  | 1(7.70%)   |       |

| 1                                            | 92(49.20%)         | 72(78.30%)         | 20(21.70%)         | 0.396   |
|----------------------------------------------|--------------------|--------------------|--------------------|---------|
| 2                                            | 61(32.60%)         | 50(82.00%)         | 11(18.00%)         |         |
| 3                                            | 21(11.20%)         | 15(71.40%)         | 6(28.60%)          |         |
| Artery/arteriole intima thickening           |                    |                    |                    |         |
| 0                                            | 79(42.20%)         | 64(81.00%)         | 15(19.00%)         | 0.249   |
| 1                                            | 39(20.90%)         | 34(87.20%)         | 5(12.80%)          |         |
| 2                                            | 59(31.60%)         | 44(74.60%)         | 15(25.40%)         |         |
| 3                                            | 10(5.30%)          | 7(70.00%)          | 3(30.00%)          |         |
| Artery/arteriole hyalinosi                   |                    |                    |                    | 0.519   |
| 0                                            | 105(56.10%)        | 80(76.20%)         | 25(23.80%)         |         |
| 1                                            | 47(25.10%)         | 42(89.40%)         | 5(10.60%)          |         |
| 2                                            | 21(11.20%)         | 17(81.00%)         | 4(19.00%)          |         |
| 3                                            | 14(7.50%)          | 10(71.40%)         | 4(28.60%)          |         |
| Chronic change                               |                    |                    |                    | 0.519   |
| Minical chronic changes(0-1)                 | 10(5.30%)          | 9(90.00%)          | 1(10.00%)          |         |
| Mild chronic changes(2-4)                    | 66(35.30%)         | 52(78.80%)         | 14(21.20%)         |         |
| Moderate chronic changes(5-7)                | 61(32.60%)         | 51(83.60%)         | 10(16.40%)         |         |
| Severe chronic changes( $\geq 8$ )           | 50(26.70%)         | 37(74.00%)         | 13(26.00%)         |         |
| Ultrasound Parameters                        | Total (n=187)      | Train(n=149)       | Test(n=38)         | P-value |
| Mean SWE value of left renal cortex (kPa)    | 10.60(9.50–12.50)  | 10.50(9.30–12.40)  | 10.55(9.68–12.50)  | 0.606   |
| Median SWE value of left renal cortex (kPa)  | 10.60(9.20–12.60)  | 10.60(9.15–12.60)  | 10.65(9.45–12.45)  | 0.618   |
| Mean SWE value of left renal medulla (kPa)   | 6.50(5.50–8.20)    | 6.50(5.50–8.10)    | 6.50(5.68–9.00)    | 0.586   |
| Median SWE value of left renal medulla (kPa) | 6.50(5.30–8.40)    | 6.40(5.20–8.30)    | 6.60(5.68–9.23)    | 0.365   |
| Mean SWE value of left renal sinus (kPa)     | 13.40(12.10–14.80) | 13.40(12.05–14.80) | 13.20(11.70–14.95) | 0.764   |
| Median SWE value of left renal sinus (kPa)   | 13.40(11.90–14.90) | 13.40(11.80–14.80) | 13.30(11.58–15.70) | 0.928   |

|                                 |                       |                       |                       |       |
|---------------------------------|-----------------------|-----------------------|-----------------------|-------|
| Length_left kidney (mm)         | 106.00(99.00–112.00)  | 106.00(98.00–112.50)  | 105.50(99.75–110.00)  | 0.945 |
| Width_left kidney (mm)          | 45.00(42.00–49.00)    | 45.00(42.00–49.00)    | 44.00(41.00–48.00)    | 0.415 |
| Thickness_left kidney (mm)      | 43.40(39.00–46.50)    | 44.00(40.00–47.00)    | 42.00(38.75–45.00)    | 0.069 |
| Kidney volume(cm <sup>3</sup> ) | 201.35(173.04–238.66) | 206.19(175.37–242.82) | 188.27(168.05–230.97) | 0.279 |

---

CKD fo\_1~2, patients at CKD stage 1~2 at the last follow-up time. CKD fo\_3~5, patients at CKD stage 3~5 at the last follow-up time; G\_G\_Sclerosis, Glomerular\_Global Sclerosis; G\_FS\_Sclerosis, Glomerular\_Focal Segmental Sclerosis; G\_Crescents, Glomerular\_Crescents; G\_Fibrinoid necrosis, Glomerular\_Fibrinoid necrosis; L\_C\_mean, mean SWE value of left renal cortex; L\_C\_median, median SWE value of left renal cortex; L\_M\_mean, mean SWE value of left renal medulla; L\_M\_median, median SWE value of left renal medulla; L\_S\_mean, mean SWE value of left renal sinus; L\_S\_median, median SWE value of left renal sinus; Length,Width, Thickness, and Kidney volume, are length, width, thickness, and product of length and width and thickness of left kidney respectively. All parameters were collected at the time of biopsy.
